# Supplementary material
Source: HighWire-hosted journal article supplement (http://jpet.aspetjournals.org/highwire/filestream/148157/field_highwire_adjunct_files/0/JPET_0000152_Data_Supplement.pdf)
Supplement: JPET_0000152_Data_Supplement.pdf [file JPET_0000152_Data_Supplement.pdf]

**Celastrol dilates and counteracts ethanol-induced constriction of cerebral arteries**

Kelsey North, Alexandria Slayden, Steven Mysiewicz, Anna Bukiya and Alex Dopico  
Department of Pharmacology, Addiction Science and Toxicology, College of Medicine, The  
University of Tennessee Health Science Center, Memphis, TN, 38103

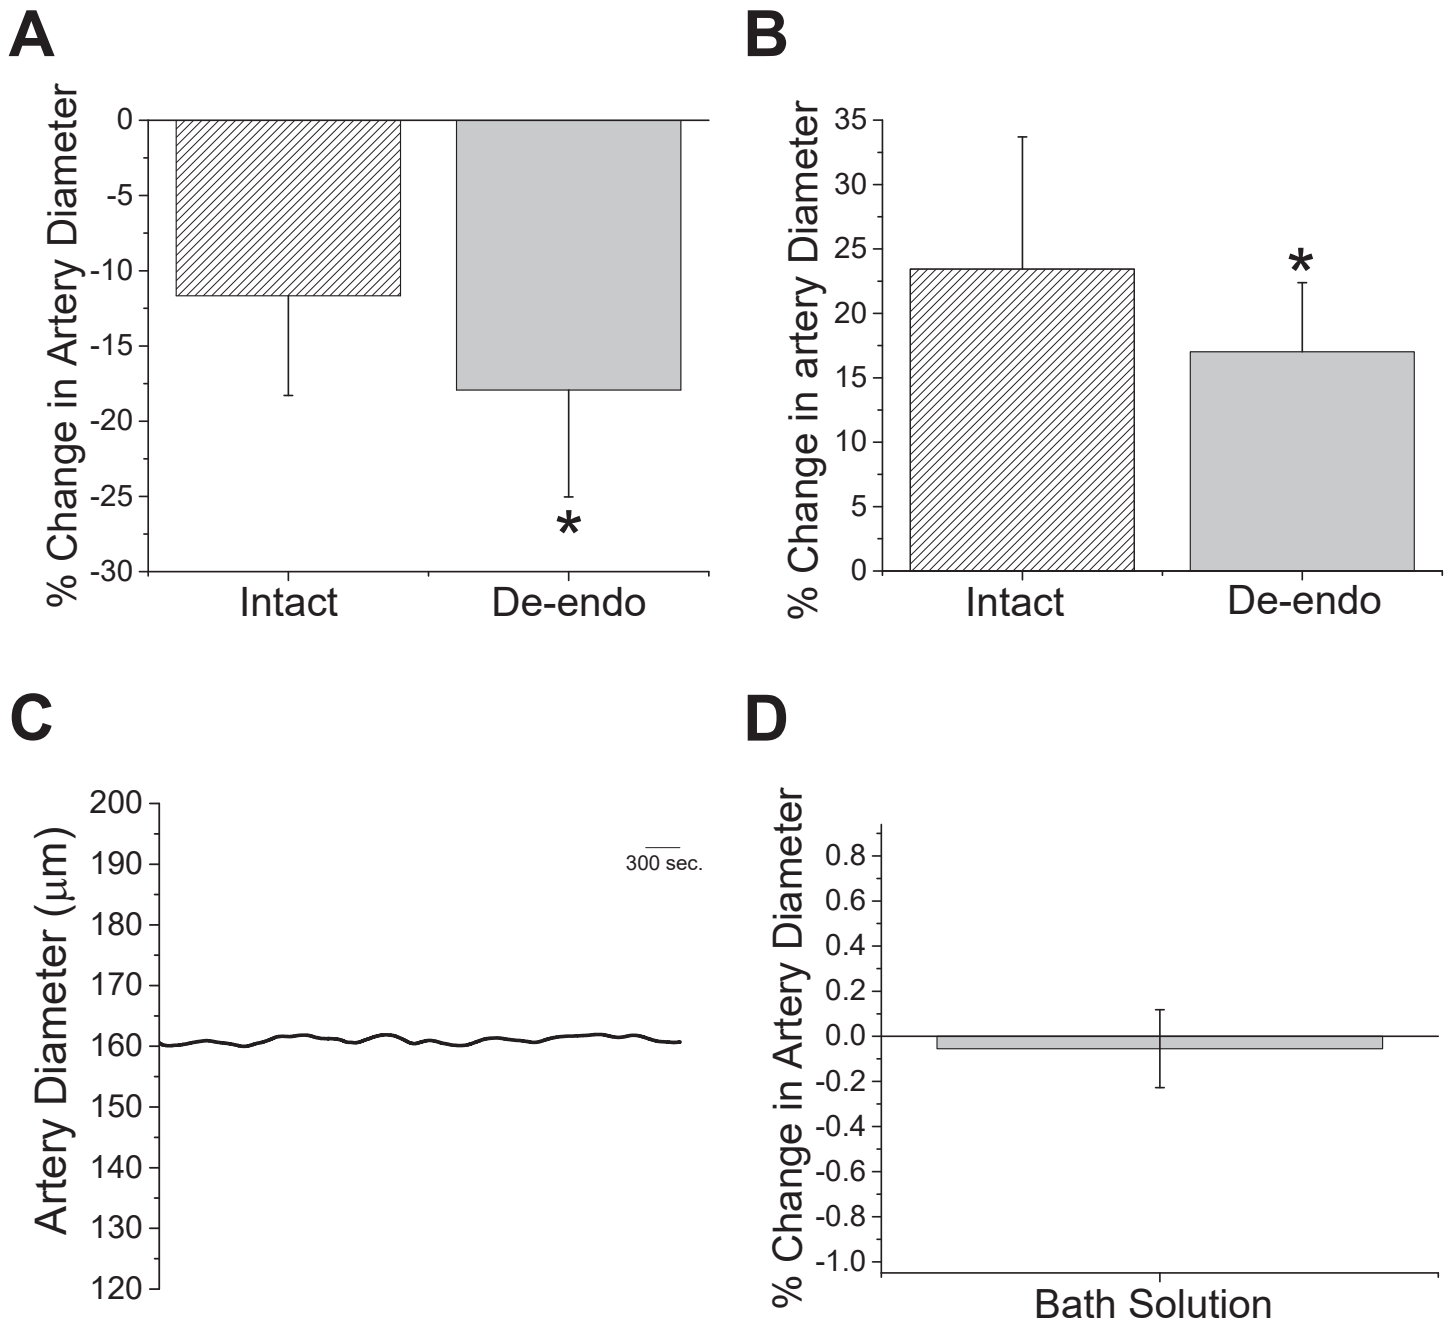

**Supplementary Figure 1. Contraction and dilation of rat middle cerebral arteries (MCA) in response to 60 mM KCl and calcium-free PSS.** A. Comparison of intact and de-endothelialized (De-endo) MCA response to 60 mM KCl bath solution ( $P < 0.05$ , Student's  $t$ -test). B. Comparison of intact and de-endothelialized MCA response to calcium-free bath solution ( $P < 0.05$ , Student's  $t$ -test). \*Different from intact MCA. C. Representative MCA diameter trace of inter-recording variability when exposed to bath solution (PSS). D. Variability in artery diameter when exposed to PSS ( $n=5$ ).
